1 Tissue Forge: Interactive Biological and  
2 Biophysics Simulation Environment

3 T.J. Sego<sup>1\*</sup>

James P. Sluka<sup>2</sup>

Herbert M. Sauro<sup>3</sup>

James A. Glazier<sup>2</sup>

<sup>1</sup>Department of Medicine

University of Florida, Gainesville, FL, USA

<sup>2</sup>Department of Intelligent Systems Engineering and

The Biocomplexity Institute

Indiana University, Bloomington, IN, USA

<sup>3</sup>Department of Bioengineering

University of Washington, Seattle, WA, USA

\*Corresponding author

P.O. Box 100225

Gainesville, FL, 32611, USA

Email: [timothy.sego@medicine.ufl.edu](mailto:timothy.sego@medicine.ufl.edu)

4 November 27, 2022

5

## Abstract

6 Tissue Forge is an open-source interactive environment for particle-  
7 based physics, chemistry and biology modeling and simulation. Tissue  
8 Forge allows users to create, simulate and explore models and virtual  
9 experiments based on soft condensed matter physics at multiple scales,  
10 from the molecular to the multicellular, using a simple, consistent in-  
11 terface. While Tissue Forge is designed to simplify solving problems in  
12 complex subcellular, cellular and tissue biophysics, it supports applica-  
13 tions ranging from classic molecular dynamics to agent-based multice-  
14 lular systems with dynamic populations. Tissue Forge users can build  
15 and interact with models and simulations in real-time and change simu-  
16 lation details during execution, or execute simulations off-screen and/or  
17 remotely in high-performance computing environments. Tissue Forge pro-  
18 vides a growing library of built-in model components along with support  
19 for user-specified models during the development and application of cus-  
20 tom, agent-based models. Tissue Forge includes an extensive Python API  
21 for model and simulation specification via Python scripts, an IPython con-  
22 sole and a Jupyter Notebook, as well as C and C++ APIs for integrated  
23 applications with other software tools. Tissue Forge supports installations  
24 on 64-bit Windows, Linux and MacOS systems and is available for local  
25 installation via conda.

## 26 1 Author Summary

27 Tissue Forge is a physics-based modeling and simulation software environment  
28 for research problems in physics, chemistry and biology. Tissue Forge supports  
29 modeling at a wide range of scales, from as small as the sub-nanometer, to  
30 as large as hundreds of micrometers, using particle-based models. It provides  
31 rich features for simulation development and application at all stages of model-

32 based research, like real-time simulation visualization and interactivity, and  
33 off-screen batch execution, rendering, and GPU acceleration. Users can employ  
34 built-in models to represent a wide variety of physical processes, like chemical  
35 reactions, fluid convection and intercellular adhesion, or define their own models  
36 for agent- and rule-based modeling. Tissue Forge is open-source, free and easy to  
37 install, supports simulation development in C, C++ and Python programming  
38 languages, and can be used as integrated software or in an interactive IPython  
39 console and Jupyter Notebook. Tissue Forge also provides a dedicated space  
40 for application-specific and user-contributed modeling and simulation features,  
41 and developers are welcome to contribute their custom features for distribution  
42 in future releases.

## 43 **2 Introduction**

44 Computational modeling and simulation are key components of modern bio-  
45 logical research. Simulations codify knowledge into computable representations  
46 that can challenge and validate our understanding of complex biological pro-  
47 cesses. A well defined model not only explains currently available data but also  
48 predicts the outcomes of future experiments. Biological computer simulations  
49 can address a wide range of length scales and employ numerous numerical and  
50 simulation technologies. Scales include that of the atomic bond length to model  
51 small molecules, proteins and other biological macromolecules, the macromolec-  
52 ular scale to model protein aggregates, the subcellular and cellular scales to  
53 model cells and aggregates of cells, the tissue scale to model long-range in-  
54 teraction between cell aggregates that give rise to organ-level behaviors, the  
55 whole-body scale where organs interact, and the population scale where indi-  
56 viduals interact with each other and their environment. At various biological  
57 scales, models can represent biological objects as either discrete or as numeri-

58 cally aggregated populations, and so different mathematical and computational  
59 approaches are used to simulate behaviors at each scale. When spatiality is  
60 explicitly modeled, molecular dynamics (**MD**) simulations are often used at the  
61 atomic and macromolecular scales and spatial agent-based models are used at  
62 the higher scales. Often, discrete biological objects (*molecules, cells, cell aggre-*  
63 *gates*) are appropriately modeled as discrete objects at a particular scale, and  
64 then as numerically aggregated populations at higher scales using continuous  
65 dynamics like ordinary differential equations (**ODEs**) and partial differential  
66 equations (**PDEs**), which then describe the dynamics of a population of ob-  
67 jects. For example, modeling at the multicellular scale can represent molecules  
68 of a given chemical species as densities or amounts, and at the molecular level  
69 as discrete molecules. While population models can have significant explana-  
70 tory value, biology is intrinsically spatial. Emergent biological properties and  
71 behaviors arise in part because of the spatial relationships of their components.  
72 Population models sacrifice this aspect of biological organization.

73 In the subcellular, cellular and multicellular modeling domain, most spa-  
74 tiotemporal agent-based biological simulation tools only support one cellular  
75 dynamics simulation methodology, and focus on a particular problem domain  
76 with a particular length scale. For example, CompuCell3D (**CC3D**) [1] and  
77 Morpheus [2] implement cell model objects using the Cellular Potts model  
78 (**CPM**)/ Glazier-Graner-Hogeweg (**GGH**) formalism [3], and only support  
79 Eulerian, lattice-based models, while others like PhysiCell [4] and CHASTE  
80 [5] support modeling cells with Lagrangian, lattice-free, particle-based center  
81 models as simple, point-like cell particles. Lattice-free, particle-based methods  
82 can be extended to include subcellular detail using the Subcellular Element  
83 Model [6], which could support modeling the spatial complexity of cell shape,  
84 cytoskeleton and extracellular matrix. Extending the CPM/GGH to include

85 cellular compartments [7] allows representation of subcellular components like  
86 the nucleus, critical molecular species or regions with specific properties but  
87 does not support specific representation of macromolecular machinery. Typi-  
88 cally, modelers who are interested in subcellular and cellular detail must use  
89 and adapt general-purpose MD simulation tools like LAMMPS [8], HOOMD-  
90 blue [9], NAMD [10] or GROMACS [11]. For example, Shafiee et al., customized  
91 LAMMPS to model cells as clusters of particles to simulate spheroid fusion dur-  
92 ing spheroid-dependent bioprinting [12].

93 Most MD simulation tools are designed to parse and execute models that are  
94 theoretically well defined and MD simulation specifications and engines tend to  
95 be well optimized for computational performance. Most assume a fixed numbers  
96 of objects within a model and do not support runtime object creation, destruc-  
97 tion or modification. Many do not support real-time simulation visualization  
98 and user interactivity. In addition, extending these modeling environments with  
99 custom modeling and simulation features requires software development in C  
100 or C++ code. Results can be post-processed after execution, though this re-  
101 quires developing a pipeline of model development, simulation execution and  
102 data generation using a simulation tool, and data visualization and analysis  
103 using different visualization tools (*e.g.*, The Visualization Toolkit [13]) or a gen-  
104 eral purpose programming language like Python, which significantly increases  
105 user effort to produce useful results. To reduce user effort required to produce  
106 publishable simulation results and analysis, some simulation tools provide real-  
107 time simulation visualization and limited simulation interaction (*e.g.*, CC3D  
108 and Morpheus). Cell simulation tools with real-time visualization are often  
109 implemented as stand-alone programs, rather than as portable libraries that  
110 support integration with other modeling environments. This lack of software  
111 interoperability also complicates using simulation tools with other specialized

112 software libraries (*e.g.*, optimization tools) in advanced computational work-  
113 flows for solving difficult biological problems such as reverse-engineering model  
114 parameters, interrogation of mechanisms, or Bayesian modeling of populations.

115 This paper presents Tissue Forge, an open-source, real-time, modeling and  
116 simulation environment for interactive biological and biophysics modeling appli-  
117 cations over a broad range of scales. Tissue Forge is designed to address many  
118 of the aforementioned issues and challenges. Tissue Forge enables agent-based,  
119 spatiotemporal computational modeling at scales from the molecular to the mul-  
120 ticellular. It is designed for ease of use by modelers, research groups and collab-  
121 orative scientific communities with expertise ranging from entry- to advanced-  
122 level programming proficiency. It supports all stages of model-supported re-  
123 search, from initial model development and validation to large-scale virtual ex-  
124 periments. Here we describe the philosophy, mathematical formalism and basic  
125 features of Tissue Forge. To demonstrate its usefulness across multiple disci-  
126 plines in the physical and life sciences, we also present representative examples  
127 of advanced features at a variety of target scales.

### 128 **3 Overview**

129 Tissue Forge seeks address some of the limitations of current modeling pack-  
130 ages by providing a spatiotemporal modeling and simulation environment that  
131 supports multiple lattice-free, particle-based methods for agent-based model-  
132 ing. It simplifies research by supporting representation of a wide range of scales  
133 encountered in biophysics, chemistry and biological applications. Tissue Forge  
134 supports the development, testing and deployment of models in large-scale, high-  
135 performance simulation, performed by users with a wide range of expertise and  
136 coding proficiency in multiple programming languages.

### 137 3.1 Problem Domain

138 Simulation of complex systems, particularly in biological problems, is difficult  
139 for a number of reasons. Difficulties exist for both the domain knowledgeable  
140 modeler and the modeling tool developer. Problems in cell biology and bio-  
141 physics applications often require representations of objects and processes at  
142 multiple scales, which resolve to spatiotemporal, agent-based models with com-  
143 plex rules and decision making using embedded models of internal agent state  
144 dynamics (*e.g.*, chemical networks). Since such models are experimentally or  
145 empirically determined and highly diverse, their implementation requires flexi-  
146 ble, robust model and simulation specification. Likewise, the spatial scale itself  
147 presents the challenge of choosing an appropriate mathematical framework for  
148 creating model objects and processes (*e.g.*, whether to model a cell with com-  
149 plex shape or simply as a sphere). Often, the modeler must learn a new software  
150 tool for each spatial scale they wish to model. In addition, the model features  
151 and computational performance of a particular software tool can be limited  
152 by the underlying mathematical framework, unpermissive or demanding object  
153 definitions, or the need for efficient use of computing resources.

154 Tissue Forge addresses these issues by providing an agent-based, spatiotem-  
155 poral modeling and simulation framework built on a flexible, particle-based  
156 formalism. Particles, which are the fundamental agents of any Tissue Forge  
157 simulation, are suitable basic objects in model construction because they mini-  
158 mally constrain a model description. A Tissue Forge particle is an instance of a  
159 categorical descriptor called a "particle type," and is a discrete agent that has  
160 a unique identity, occupies a position at each moment in time and has velocity  
161 and mass or drag. Tissue Forge imposes no further restrictions on what physical  
162 or abstract object a particle represents. This framework has the theoretical and  
163 computational flexibility to enable agent-based, spatiotemporal computational

164 models across a broad range of scales. An instance of a particle could represent  
165 an atom, or a cell, or a multicellular aggregate. Tissue Forge accommodates  
166 models with both pre- and user-defined particle behaviors and interactions, the  
167 creation and deletion of particles at runtime, and consistent object modeling at  
168 multiple scales.

169 **Interactive and Batch Execution.** Tissue Forge supports the efficient de-  
170 velopment agent-based models of complex systems. In general, the development  
171 of a computational model involving multiple interacting agents requires iterative  
172 cycles of model development, execution, analysis, and refinement. During model  
173 exploration, refinement and validation, modelers can benefit from a simulation  
174 environment that allow them to observe, interact with, and refine a simulation as  
175 it executes (*i.e.*, real-time simulation and visualization). However, computa-  
176 tionally intensive investigations of developed models (*e.g.*, characterizing emergent  
177 mechanisms or the effects of system stochasticity, systems with large numbers of  
178 objects) require efficient high-performance computing utilization and batch ex-  
179 ecution. Tissue Forge supports both interactive and batch operation, providing  
180 both rapid and intuitive model development and high-performance simulation  
181 execution, so that modelers do not need to find and learn multiple software tools  
182 or settle for a tool that is either, but not both, feature rich or computationally  
183 efficient. Its interactive simulation mode is a stand-alone application with real-  
184 time visualization and user-specified events. Its batch mode leverages available  
185 resources in high-performance computing environments such as computing clus-  
186 ters, supercomputers, and cloud-based computing, and exports simulation data  
187 and high-resolution images. In batch mode, Tissue Forge can be included in  
188 workflows to carry out modeling task such as model fitting or simulation of  
189 replicates and populations.

190 **Open Science Support.** Development and dissemination of models that



191 leverage interdisciplinary knowledge and previous modeling projects require ro-  
192 bust support for scientific communication, collaboration, training and reuse.  
193 Tissue Forge provides a declarative model specification for many basic aspects of  
194 particle-based models and simulations (*e.g.*, particle type definitions, particle in-  
195 teractions and stochastic motion via generalized force and potential definitions)  
196 with robust support for procedural specification of complex, agent-based models  
197 particular to specific applications. Tissue Forge also supports model sharing and  
198 collaborative development by providing built-in support for exporting and im-  
199 porting simulations and model object states to and from human-readable string  
200 data (using JSON format). In support of collaborative, community-driven and  
201 application-specific development of models, the Tissue Forge code base provides  
202 a designated space in which developers can implement features in customized  
203 Tissue Forge builds. Extending the Tissue Forge API with custom interfaces  
204 requires minimal effort in all supported software languages. Developers are also  
205 welcome to submit their custom features to the public Tissue Forge code repos-  
206 itory for future public release as built-in features, or to design their software  
207 applications using Tissue Forge as an external software library. Along with exe-  
208 cuting scripted simulations specified in C, C++ and Python programming lan-  
209 guages, Tissue Forge also supports collaboration, training and scientific commu-  
210 nication through its Python API support for interactive simulations in Jupyter  
211 Notebooks. Tissue Forge simplifies robust model construction and simulation  
212 development through expressive model specification (*e.g.*, process arithmetic),  
213 a flexible event system for implementing model-specific rules (*e.g.*, agent rules)  
214 and simulation-specific runtime routines (*e.g.*, importing and exporting data),  
215 and a simple, intuitive simulation control interface (*e.g.*, switching between in-  
216 teractive and off-screen execution).

## 217 3.2 Concepts

218 Tissue Forge updates the trajectory of a particle in time by calculating the  
219 net force acting on the particle. Forces determine the trajectory of a particle  
220 according to the dynamics of the particle type. Tissue Forge currently supports  
221 Newtonian and Langevin (overdamped) dynamics, which can be individually  
222 specified for each particle type of a simulation.

223 For Newtonian dynamics, the position  $\mathbf{r}_i$  of the  $i$ th particle is updated ac-  
224 cording to its acceleration, which is proportional to its mass  $m_i$  and the total  
225 force  $\mathbf{f}_i$  exerted on it,

$$\mathbf{f}_i = m_i \frac{d^2 \mathbf{r}_i}{dt^2}, \quad (1)$$

226  
227 and for Langevin (overdamped) dynamics,  $m_i$  is the drag coefficient and the  
228 particle velocity is proportional to the total force,

$$\mathbf{f}_i = m_i \frac{d\mathbf{r}_i}{dt}. \quad (2)$$

229  
230 Tissue Forge supports three broad classes of force-generating interaction,

$$\mathbf{f}_i = \sum_{j \neq i} \left( \mathbf{F}_{ij}^{impl} + \mathbf{F}_{ij}^{bond} \right) + \mathbf{F}_i^{expl}. \quad (3)$$

231  
232  $\mathbf{F}_{ij}^{impl}$  is the force due to *implicit* interactions between the  $i$ th and  $j$ th particles,  
233  $\mathbf{F}_{ij}^{bond}$  is the force due to *bonded* interactions between the  $i$ th and  $j$ th particles,  
234 and  $\mathbf{F}_i^{expl}$  is the explicit force acting on the  $i$ th particle. Implicit interactions  
235 result automatically from interaction potentials between pairs of particles of  
236 given types. Bonded interactions act between specific pairs of individual par-

237 ticles (Figure 1A). Explicit forces act on particles through explicitly-defined  
238 force descriptions and do not necessarily represent inter-particle interactions  
239 (*e.g.*, gravity, internal noise, system thermal equilibrium). Tissue Forge provides  
240 built-in force- and potential-based definitions, supports user-specified definitions  
241 for both, and permits applying an unlimited number of executable Tissue Forge  
242 force and potential objects to individual particles and particle types.

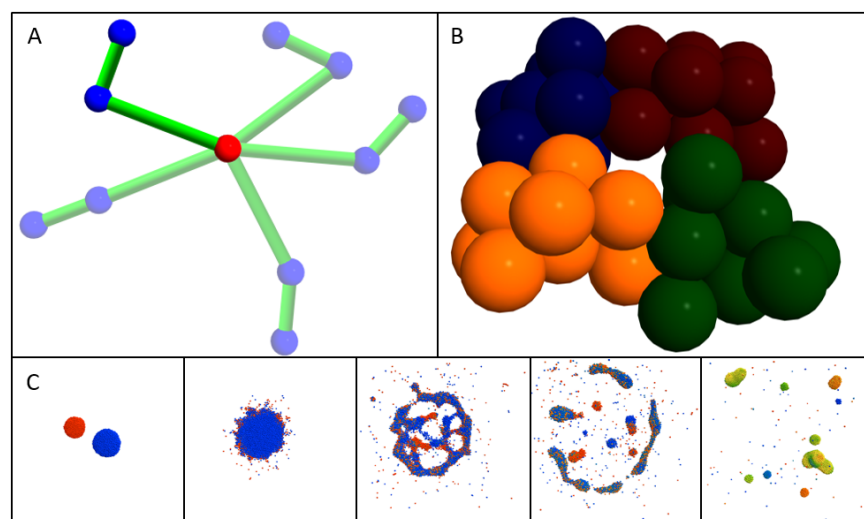

Figure 1: Examples of Tissue Forge modeling features. A: Five superimposed snapshots of a double pendulum implemented in Tissue Forge. Bonded interactions (represented as green cylinders) explicitly describe the interaction between a particular pair of particles, while a constant force acts on the blue particles in the downward direction. The red particle is fixed. B: Four Tissue Forge clusters representing biological cells, each consisting of ten particles whose color demonstrates cluster membership. Potentials describe particle interactions by whether they are in the same cluster (*i.e.*, intracellular) or different clusters *i.e.*, intercellular. C: Tissue Forge simulation of chemical flux during fluid droplet collision. Each particle represents a portion of fluid that carries an amount of a diffusive chemical, the amount of which varies from zero (blue) to one (red). When two droplets carrying different initial chemical amounts collide, resulting droplets tend towards homogeneous chemical distributions.

243 Implicit interactions are defined in Tissue Forge using potential functions and  
244 applied according to the types of two interacting particles. The force between

245 the  $i$ th and  $j$ th interacting particles resulting from their implicit interactions  
246 is calculated as the sum of each  $k$ th potential  $U_{ijk}^{impl}$  that defines the implicit  
247 interaction,

$$\mathbf{F}_{ij}^{impl} = -\frac{\partial}{\partial \mathbf{r}_i} \sum_k U_{ijk}^{impl}. \quad (4)$$

248

249 Bonded interactions are defined in Tissue Forge using potential functions and  
250 are applied according to the identities of two interacting particles. The force  
251 between the  $i$ th and  $j$ th interacting particles resulting from their bonded in-  
252 teractions is calculated as the sum of each  $k$ th potential  $U_{ijk}^{bond}$  that defines the  
253 bonded interaction,

$$\mathbf{F}_{ij}^{bond} = -\frac{\partial}{\partial \mathbf{r}_i} \sum_k U_{ijk}^{bond}. \quad (5)$$

254

255 Explicit forces can be defined on the basis of particle type or on individual par-  
256 ticles. The force on the  $i$ th particles resulting from external forces is calculated  
257 as the sum of each  $k$ th explicit force  $\mathbf{F}_{ik}^{expl}$ ,

$$\mathbf{F}_i^{expl} = \sum_k \mathbf{F}_{ik}^{expl}. \quad (6)$$

258 Since Tissue Forge enables the implementation and execution of models at  
259 different length scales, particles in a simulation may represents objects with  
260 a wide variety of possible behaviors. A particle could be atomic and subject  
261 to energy-conserving, implicit interactions (*e.g.*, Coulomb, Morse or Lennard-  
262 Jones potentials) as in classic MD. Particles can also represent portions of ma-  
263 terial that constitute larger objects (*e.g.*, a portion of cytoplasm) and can carry  
264 quantities of materials within them (*e.g.*, convection of a solute chemical in a

265 portion of a fluid, Figure 1C). Tissue Forge provides built-in features to enable  
266 particle-based modeling and simulation of fluid flow based on transport dissipa-  
267 tive particle dynamics (*tDPD*) and smooth particle hydrodynamics, including  
268 a predefined *tDPD* potential  $U_{ij}^{tDPD}$  that can be applied when describing the  
269 interactions of a simulation,

$$-\frac{\partial U_{ij}^{tDPD}}{\partial \mathbf{r}_i} = \mathbf{F}_{ij}^C + \mathbf{F}_{ij}^D + \mathbf{F}_{ij}^R, \quad (7)$$

270

271 where the interaction between the  $i$ th and  $j$ th fluid-like particles is a sum of a  
272 conservative force  $\mathbf{F}_{ij}^C$ , a dissipative force  $\mathbf{F}_{ij}^D$  and a random force  $\mathbf{F}_{ij}^R$  acting on  
273 the  $i$ th particle.

274 To support treating particles as constituents of larger objects, Tissue Forge  
275 provides a special type of particle, a *cluster*, whose elements can consist of con-  
276 stituent particles or other clusters. Clusters provide a convenient way to define  
277 implicit interactions that only occur between particles within the same cluster  
278 (*e.g.*, intracellular interactions), called *bound* interactions, and those that only  
279 occur between particles from different clusters (*e.g.*, intercellular interactions),  
280 called *unbound* interactions (Figure 1B).

281 To allow particles to carry embedded quantities, Tissue Forge supports at-  
282 taching to each particle a vector of states that can evolve during a simulation.  
283 The values of the states can evolve according to laws defined between pairs of  
284 particle types for inter-particle transport (*e.g.*, diffusion), which Tissue Forge  
285 automatically applies during simulation, or according to local, intra-particle re-  
286 actions. The time evolution of a state vector  $\mathbf{C}_i$  attached to the  $i$ th particle  
287 is,

$$\frac{d\mathbf{C}_i}{dt} = \mathbf{Q}_i = \sum_{j \neq i} \mathbf{Q}_{ij}^T + \mathbf{Q}_i^R, \quad (8)$$

288

289 where the rate of change of the state vector attached to the  $i$ th particle is equal  
290 to the sum of the transport fluxes  $Q_{ij}^T$  between the  $i$ th and each nearby  $j$ th  
291 particle and the local reactions  $Q_i^R$ .

### 292 3.3 Basic Features

293 Tissue Forge supports model and simulation specification using classes, objects  
294 and functions typical to object-oriented concepts in C, C++ and Python pro-  
295 gramming languages. In Python, custom Tissue Forge particle types can be  
296 defined by creating Python classes and specifying class attributes (Listing 1).

```
297  
298 1 # Get the Tissue Forge Python library  
299 2 import tissue_forge as tf  
300 3 # Specify a particle type with a particular radius  
301 4 class OscType(tf.ParticleTypeSpec):  
302 5     radius = 0.5  
303
```

Listing 1: Importing the Tissue Forge library and declaring a particle type in Python. Comments are shown in green.

304 Tissue Forge allows specification of particle types without an initialized Tis-  
305 sue Forge runtime. However, initializing the Tissue Forge runtime, which in  
306 Python only requires a call to a single module-level function, permits retrieving  
307 template executable particle types that can be used to create particles (List-  
308 ing 2). When a particle of a particular particle type is created, the particle  
309 inherits all attributes of its type (*e.g.*, mass), which can in turn be modified  
310 for the particular particle at any time during simulation. Initializing the Tissue  
311 Forge runtime requires no user-specified information, in which case a default  
312 configuration is provided, but explicit initialization provides a number of cus-  
313 tomization options to tailor a simulation to a particular problem (*e.g.*, domain  
314 size, interaction cutoff distance).

```
315
316 1 # Initialize with a 10x10x10 domain and cutoff distance of 3
317 2 tf.init(dim=[10, 10, 10], cutoff=3)
318 3 # Get the oscillator type and create two particles
319 4 osc_type = OscType.get() # a particle type
320 5 osc_part1 = osc_type([4, 5, 5]) # particle 1: x,y,z coords
321 6 osc_part2 = osc_type([6, 5, 5]) # particle 2: x,y,z coords
322 7 # Change the radius of one of the particles
323 8 osc_part2.radius = 0.25
324
```

Listing 2: Initializing a Tissue Forge simulation, retrieving an executable particle type and creating particles in Python.

325 Users specify and apply interactions, whether using built-in or custom poten-  
326 tial functions or explicit forces, by creating Tissue Forge objects that represent  
327 processes (*e.g.*, a force object), called *process objects*, and applying them cate-  
328 gorically by predefined ways that processes can act on objects (*e.g.*, by type pairs  
329 for implicit interactions). Tissue Forge calls applying a process to model objects  
330 *binding*, which Tissue Forge applies automatically during simulation execution  
331 according to the model objects and process. For example, users can specify an  
332 implicit interaction between particles to two types by creating a potential object  
333 and binding it to the two particle types (Listing 3).

```
334
335 1 # Create a harmonic potential object
336 2 pot = tf.Potential.harmonic(k=1, r0=1.5)
337 3 # Bind the harmonic potential to pairs of
338 4 # particles of the oscillator type
339 5 tf.bind.types(pot, osc_type, osc_type)
340
```

Listing 3: Creating a Tissue Forge potential and binding it to particles by type in Python.

341 Tissue Forge provides fine-grained simulation control, where each integra-  
342 tion step can be explicitly executed, with other user-defined tasks accomplished

343 between executing simulation steps (*e.g.*, exporting simulation data). For in-  
344 teractive execution, Tissue Forge simulations are usually executed using a basic  
345 `run` function, which executes an event loop that (1) integrates the universe, (2)  
346 processes user input (*e.g.*, keyboard commands), (3) updates simulation visual-  
347 ization, and (4) executes an event system with user-defined events. The Tissue  
348 Forge event system allows users to insert instructions into the event loop via  
349 user-defined functions (Listing 4). Events can be executed at arbitrary fre-  
350 quencies, can automatically retrieve simulation data (*e.g.*, a randomly selected  
351 particle of a specific type), and can change qualities of individual particles (*e.g.*,  
352 change the radius of a particular particle based on its environment).

```
353  
354 1 # Define an event that prints the time and particle x-coordinate  
355 2 def my_event(e: tf.event.TimeEvent):  
356 3     print('Time:', tf.Universe.time)  
357 4     print('p1 x position:', osc_part1.position.x())  
358 5     print('p2 x position:', osc_part2.position.x())  
359 6 # Register the event for execution at every simulation step  
360 7 tf.event.on_time(period=tf.Universe.dt, invoke_method=my_event)  
361 8 # Run the simulation  
362 9 tf.run()  
363
```

Listing 4: Creating a Tissue Forge event and running an interactive simulation in Python.

364 During simulation execution, including during execution of user-defined events,  
365 Tissue Forge objects are available for accessing and manipulating simulation,  
366 universe and system information. The Python code described in this section  
367 generates the Tissue Forge simulation depicted in Figure 2 (see Supplementary  
368 Materials S2), and also prints the current simulation time and  $x$ -coordinate of  
369 both particles at every simulation step. This simulation can be executed as a  
370 Python script or in an IPython console.

371 In a Jupyter Notebook, this code executes the same simulation but generates



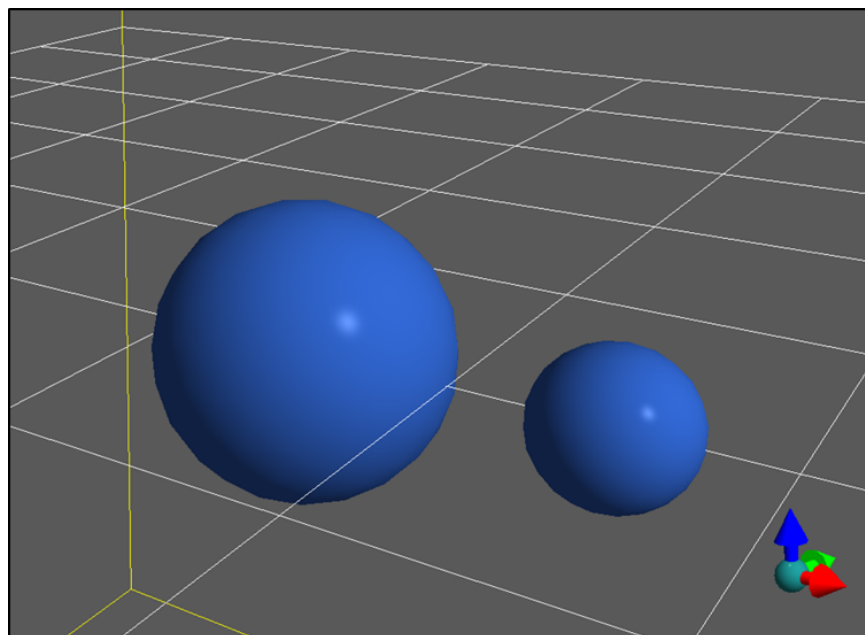

Figure 2: Tissue Forge simulation of a simple oscillator with two particles interacting via a harmonic potential. Tissue Forge helps to orient the user by drawing a yellow box around the simulation domain, a white grid along the  $xy$  plane at the center of the domain, and an orientation glyph at the bottom right to demonstrate the axes of the simulation domain with reference to the camera view, where red points in the  $x$  direction, green in the  $y$  direction and blue in the  $z$  direction.

372 an additional user interface, which provides widgets for interactive simulation  
373 controls, *e.g.*, for pausing and resuming the simulation, and choosing predefined  
374 camera views (Figure 3). When running Tissue Forge from a Python script or  
375 IPython console, the interface supports mouse control (*e.g.*, click and drag to  
376 rotate) and predefined and user-defined keyboard commands (*e.g.*, space bar  
377 to pause or resume the simulation). In interactive contexts like IPython and  
378 Jupyter Notebooks, the Tissue Forge event loop recognizes user commands issued  
379 *ad hoc* during simulation, allowing on-the-fly modification of the simulation  
380 state, which is especially useful during model development and interrogation  
381 (*e.g.*, when testing the effects of the timing of an event).

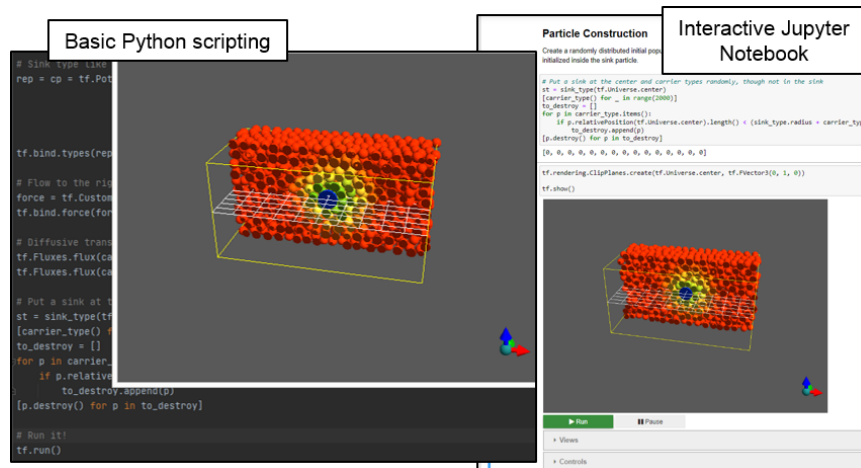

Figure 3: Sample use of the Python API to specify an interactive simulation of convection of a species near a species sink in a Python script (left) and in an interactive Jupyter Notebook (right).

### 382 3.4 Sample Modeling Applications

383 Beyond the provided catalogue of built-in potentials, potential arithmetic (*e.g.*,  
384 a potential object as the sum of two potential objects) and support for user-  
385 specified custom potentials, Tissue Forge provides process objects for binding  
386 potential-based process between specific particles (*i.e.*, a *bonded* interaction).  
387 Bonded interactions are a key component of MD modeling. Tissue Forge pro-  
388 vides a number of bond-like processes to apply potentials for various types of  
389 bonded interactions. Each bonded interaction has a representative object that  
390 contains information about the bonded interaction (*e.g.*, which particles, what  
391 potential) that Tissue Forge uses to implement it during simulation. Currently,  
392 Tissue Forge provides the `Bond` for two-particle bonded interactions (where the  
393 potential is a function of the Euclidean distance between the particles, Figure  
394 4, top left), the `Angle` for three-particle bonded interactions (where the poten-  
395 tial is a function of the angle between the vector from the second to first particles  
396 and the vector from the second and third particles, Figure 4, top middle), and

397 **Dihedral** (torsion angle) for four-particle bonded interactions (where the poten-  
398 tial depends on the angle between the plane formed by the first, second and  
399 third particles and the plane formed by the second, third and fourth particles,  
400 Figure 4, top right). Like particles, all bonded interactions can be created and  
401 destroyed at any time during simulation, and bonded interactions can also be  
402 assigned a dissociation energy so that the bond is automatically destroyed when  
403 the potential energy of the bond exceeds its dissociation energy.

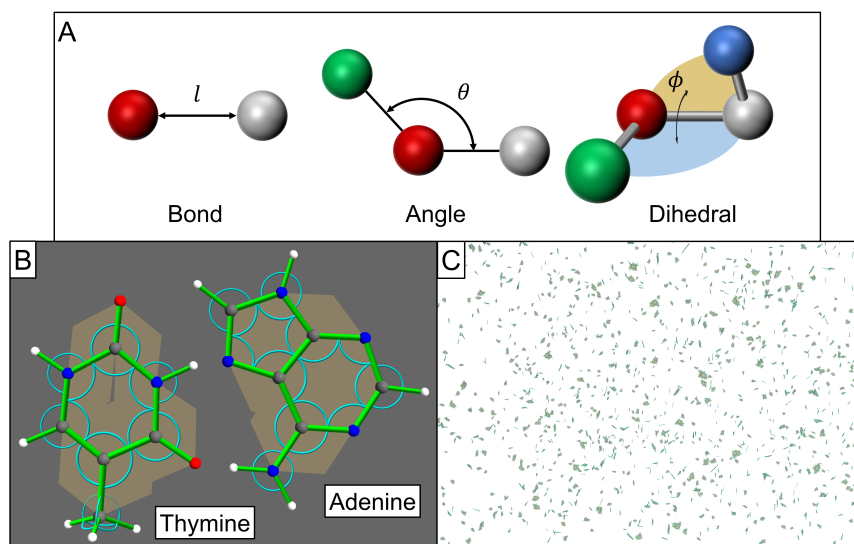

Figure 4: Molecular modeling and simulation with Tissue Forge. A: Classes of bonded interactions, where a measured property of the bond (length  $l$  for Bonds, angle  $\theta$  for Angles, and planar angle  $\phi$  for Dihedrals) is used as input to a potential function. B: Detailed view of thymine (left) and adenine (right) molecules constructed from Tissue Forge objects. Bonds shown as green cylinders, angles as blue arcs, and dihedrals as gold planes. C: Real-time simulation of a cloud of thymine and adenine molecules interacting via long-range potentials in a neutral medium.

404 Tissue Forge supports combining aspects of object-oriented programming  
405 with primitive Tissue Forge objects to define complex model objects for use in  
406 simulations. When modeling the dynamics of biomolecules, each particle can  
407 represent an atom, the atomic properties of which are defined through the Tissue

408 Forge particle type. Definitions of particular biomolecules, such as nucleobases  
409 like thymine and adenine (Figure 4B) can then be designed using generic Python  
410 (or other supported language) classes that construct an instance of a biomolecule  
411 by assembling Tissue Forge particles and bonded interactions according to ex-  
412 perimental data. Tissue Forge facilitates the construction and deployment of  
413 software infrastructure to develop interactive simulations of biomolecular sys-  
414 tems and processes (Figure 4C, see Supplementary Materials S3).

415 Particle-based methods are also useful for coarse-grained modeling of sub-  
416 cellular components, where the atoms of individual biomolecules, biomolecular  
417 complexes, or even organelles are omitted and instead represented by a sin-  
418 gle particle that incorporates the aggregate behavior of its constituents (*e.g.*,  
419 subcellular-element models). Tissue Forge supports coarse-grained subcellular  
420 modeling at various resolutions from the molecular to cellular scales, where a  
421 particle can represent a whole molecule, complex, or portion of an organelle or  
422 cytoplasm, to which coarse-grained properties (*e.g.*, net charge or phosphory-  
423 lation state) and processes (*e.g.*, pumping of a solute, metabolism of a small  
424 molecule) can be applied.

425 For example, a particle can represent a portion of a lipid bilayer, in which  
426 case a sheet of such particle with appropriate binding and periodic boundary  
427 conditions can represent a section of a cell membrane. The Tissue Forge sim-  
428 ulation domain can describe representative local spatial dynamics of the cell  
429 interface with its surrounding environment. Tissue Forge supports particle-  
430 based convection, providing a straightforward way to simulate a coarse-grained  
431 model of active transport at the cell membrane. Tissue Forge provides addi-  
432 tional transport laws to model active pumping of species into or out of particles.  
433 To model transport at the cell membrane, these transport laws support imple-  
434 menting coarse-grain models of membrane-bound complexes like ion channels,

435 which create discontinuities in concentrations of target species across the cell  
 436 membrane (Figure 5, see Supplementary Materials S4).

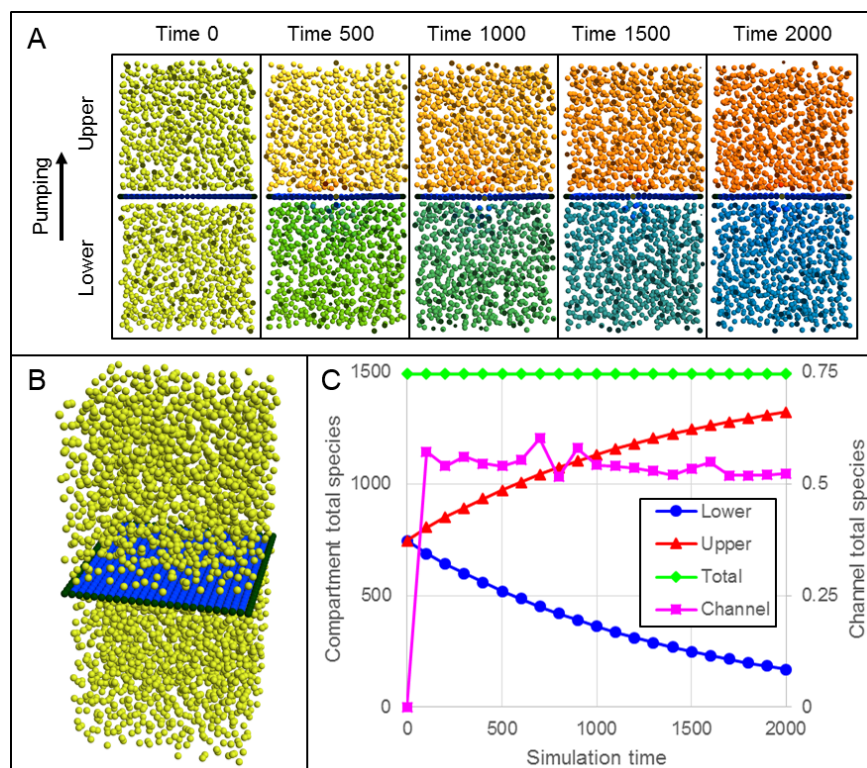

Figure 5: Active pumping of a diffusive species across a deformable membrane separating two fluid-filled compartments. A: Cut-plane views during simulation of two fluid-filled compartments separated by a deformable membrane, where each fluid is uniformly initialized with an initial concentration of a species. Particle color indicates species concentration with red as high, yellow and green as intermediate, and blue as low concentration. The membrane contains a particle that actively pumps the species from the lower to the upper compartment. B: Three-dimensional view of initial simulation state. C: Measurements of total species amounts in the lower (blue, circles), upper (red, triangles) and both (green, diamonds) compartments (left-hand vertical axis), and in the channel (magenta, squares, right-hand axis), during simulation.

437 At the coarsest scale of target applications, Tissue Forge provides support  
 438 for particle-based modeling of multicellular dynamics. Tissue Forge provides a  
 439 number of modeling features to support multicellular modeling at resolutions at

440 or near the multicellular scale, where a particle can represent an individual cell,  
441 or a part of a cell. Overdamped dynamics describe the highly viscous, fluid-  
442 like collective motion of particle-based model cells, where short-range, implicit  
443 interactions can represent volume exclusion and contact-mediated intercellular  
444 interactions (*e.g.*, adhesion), long-range, implicit interactions can represent in-  
445 tercellular signaling via soluble signaling, and particle state vectors can describe  
446 the intracellular state.

447 For example, particle-based model descriptions have been previously used to  
448 describe cells as a set of particles (*e.g.*, a Tissue Forge cluster, Figure 1B) when  
449 modeling the process of spheroid fusion in tissue bioprinting, where cohesive  
450 cell shape is maintained by Lennard-Jones and harmonic potentials between  
451 particles of the same cell, and intercellular adhesion occurs by a Lennard-Jones  
452 potential between particles of different cells [12]. In a simpler model, repre-  
453 senting each cell as a single particle and intercellular interactions with a single  
454 Morse potential can also produce emergent fusion of spheroids like those used  
455 in bioprinting of mineralized bone (*i.e.*, about 12.5k cells per spheroid, Figure  
456 6) [14]. When coupled with modeling diffusive transport and uptake like the  
457 scenario demonstrated in Figure 5, a Tissue Forge-based framework for the sim-  
458 ulation of nutrient availability during spheroid-dependent biofabrication could  
459 support detailed modeling of spheroid viability in large tissue constructs [15].

## 460 4 Discussion

461 The Tissue Forge modeling and simulation framework allows users to interac-  
462 tively create, simulate and explore models at biologically relevant length scales.  
463 Accessible interactive simulation is key to increasing scientific productivity in  
464 biomodeling, just as simulation environments are fundamental to other fields of  
465 modern engineering. Tissue Forge supports both interactive runs with real-time

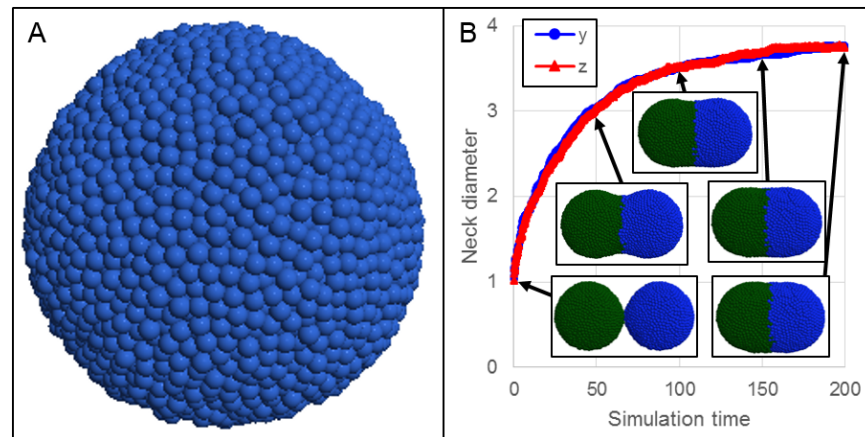

Figure 6: Simulating fusion of multicellular, homotypic spheroids. A: Spheroids of 12.5k cells each were individually pre-assembled, as in typical bioprinting practice. B: Two spheroids (green and blue) placed in close proximity fuse over time, as measured by the neck diameter along the  $y$  (blue circles) and  $z$  (red triangles) directions, which grows over time. The neck diameter along a direction is measured as the largest distance along the direction between any two particles at the mid-plane. Insets show the simulation at times 1, 50, 100, 150 and 200.

466 visualization for model development, and headless execution for data generation  
467 and integrated applications. In addition, Tissue Forge supports user-specified  
468 model features (*e.g.*, custom particle types, forces and potentials) and scheduled  
469 and keyboard-driven simulation events, with intuitive user interfaces, in multiple  
470 programming languages and frameworks, supporting beginner- to expert-level  
471 programmers and beginner- to expert-level biomodelers.

472 Tissue Forge is open-source and freely available under the LGPL v3.0 license  
473 (<https://github.com/tissue-forge/tissue-forge>). Pre-built binaries are  
474 available in C, C++ and Python on 64-bit Windows, MacOS and Linux sys-  
475 tems via conda (<https://anaconda.org/tissue-forge/tissue-forge>). On-  
476 line documentation provides information on project philosophy, installation,  
477 walk-throughs, examples (in Jupyter Notebooks, [https://github.com/tissue-forge/  
478 tissue-forge/tree/main/examples/py/notebooks](https://github.com/tissue-forge/tissue-forge/tree/main/examples/py/notebooks)) and API documentation



479 for all supported languages. It has automated build updates to maintain syn-  
480 chronization between software versions and documented features ([https://](https://tissue-forge-documentation.readthedocs.io)  
481 [tissue-forge-documentation.readthedocs.io](https://tissue-forge-documentation.readthedocs.io)), including details on features  
482 not described in this paper (*e.g.*, species transport, boundary conditions). Tis-  
483 sue Forge’s transparent development cycle, with automated continuous integra-  
484 tion and continuous delivery, rapidly and reliably delivers the latest features to  
485 users (<https://dev.azure.com/Tissue-Forge/tissue-forge>). Instructions  
486 for installing Tissue Forge are available in the Supplementary Materials S1.

487 Tissue Forge applies the abstraction of a particle to support modeling ap-  
488 plications over a wide range of scales, ranging from sub-nanometer to hundreds  
489 of micrometers and beyond. It supports future development and integration  
490 of advanced numerical and computational methods for incorporating and/or  
491 generating biological information with increasingly greater detail. Tissue Forge  
492 provides a designated space for development of application-specific models and  
493 methods by both the development team and user community, and so is free to  
494 grow and evolve into other computational domains with significant relevance and  
495 impact to a number of scientific communities. To this end, we are preparing a  
496 followup manuscript that demonstrates advanced modeling and simulation fea-  
497 tures, detailed model construction in specific applications, and relevant features  
498 that are currently under development. Tissue Forge features under develop-  
499 ment include improvements to core Tissue Forge simulation capability (*e.g.*,  
500 multi-GPU support and libRoadRunner [16] integration for network dynamics  
501 modeling), additional modeling features (*e.g.*, new built-in potentials and forces,  
502 support for improper angles in MD modeling), enhanced user experience (*e.g.*,  
503 a graphical event interface), and additional modeling methodologies and solvers  
504 (*e.g.*, vertex and subcellular element models).



## 505 **5 Conclusion**

506 Tissue Forge supports biological, chemical and physics research by providing  
507 an interactive modeling and simulation environment for particle-based model  
508 development, execution and sharing, including integration with applications in  
509 multiple programming languages. The Tissue Forge Python API supports in-  
510 teractive modeling as a standalone application or in a Jupyter Notebook, while  
511 the Tissue Forge C and C++ APIs support development of compiled and inte-  
512 grated applications for advanced and compute-intensive projects. Tissue Forge  
513 supports modeling applications over a broad range of scales, from the molecu-  
514 lar to the multicellular and beyond, and adopts a robust architecture to grow  
515 according to the needs of target scientific communities.

## 516 **6 Acknowledgments**

517 Funding for Tissue Forge is provided by NIBIB U24 EB028887 (HMS, JAG,  
518 TJS, JPS). TJS and JAG acknowledge funding from grants NSF 2120200, NSF  
519 2000281, NSF 1720625, NIH R01 GM122424. JPS acknowledges additional  
520 funding from the EPA STAR RD840027 and NSF 2054061. This research was  
521 supported in part by Lilly Endowment, Inc., through its support for the Indiana  
522 University Pervasive Technology Institute.

## 523 **7 Author Contributions**

524 **Conceptualization:** TJS, JPS, HMS, JAG

525 **Data Curation:** TJS

526 **Formal Analysis:** TJS

527 **Funding Acquisition:** TJS, JPS, HMS, JAG

528 **Investigation:** TJS

529 **Methodology:** TJS, JPS, HMS, JAG

530 **Project Administration:** TJS, HMS, JAG

531 **Resources:** TJS, JPS, HMS, JAG

532 **Software:** TJS

533 **Supervision:** TJS, HMS, JAG

534 **Validation:** TJS

535 **Visualization:** TJS

536 **Writing – Original Draft Preparation:** TJS, JPS, HMS, JAG

537 **Writing – Review Editing:** TJS, JPS, HMS, JAG

## 538 **8 Supplementary Materials**

539 **S1 Installing Tissue Forge.** Instructions for installing pre-built Tissue Forge  
540 binaries.

541 **S2 oscillator.ipynb.** Jupyter Notebook that simulates a simple oscillator with  
542 two particles.

543 **S3 dna.py.** Python script that constructs adenine and thymine nucleobases on  
544 the basis of individual atoms using Tissue Forge particles.

545 **S4 membrane.ipynb.** Jupyter Notebook that simulates a neighborhood at a  
546 deformable membrane separating two fluids and active transport between  
547 them.

## 548 References

- 549 1. Swat MH, Thomas GL, Belmonte JM, Shirinifard A, Hmeljak D, and  
550 Glazier JA. Multi-Scale Modeling of Tissues Using CompuCell3D. *Methods in cell biology* 2012; 110:325–66. DOI: [10.1016/B978-0-12-388403-9.00013-8](https://doi.org/10.1016/B978-0-12-388403-9.00013-8). Available from: <https://www.ncbi.nlm.nih.gov/pmc/articles/PMC3612985/> [Accessed on: 2022 Jun 17]
- 554 2. Starruß J, Back W de, Bruschi L, and Deutsch A. Morpheus: a user-friendly  
555 modeling environment for multiscale and multicellular systems biology. *Bioinformatics* 2014 May; 30:1331–2. DOI: [10.1093/bioinformatics/btt772](https://doi.org/10.1093/bioinformatics/btt772). Available from: <https://doi.org/10.1093/bioinformatics/btt772> [Accessed on: 2022 Jun 17]
- 559 3. Graner F and Glazier JA. Simulation of biological cell sorting using a  
560 two-dimensional extended Potts model. *Physical Review Letters* 1992  
561 Sep; 69. Publisher: American Physical Society:2013–6. DOI: [10.1103/PhysRevLett.69.2013](https://doi.org/10.1103/PhysRevLett.69.2013). Available from: <https://link.aps.org/doi/10.1103/PhysRevLett.69.2013> [Accessed on: 2022 Jun 17]
- 564 4. Ghaffarizadeh A, Heiland R, Friedman SH, Mumenthaler SM, and Macklin  
565 P. PhysiCell: An open source physics-based cell simulator for 3-D multi-  
566 cellular systems. en. *PLOS Computational Biology* 2018 Feb; 14. Pub-  
567 lisher: Public Library of Science:e1005991. DOI: [10.1371/journal.pcbi.1005991](https://doi.org/10.1371/journal.pcbi.1005991). Available from: <https://journals.plos.org/ploscompbiol/article?id=10.1371/journal.pcbi.1005991> [Accessed on: 2022 Jun  
570 17]
- 571 5. Mirams GR, Arthurs CJ, Bernabeu MO, Bordas R, Cooper J, Corrias A,  
572 Davit Y, Dunn SJ, Fletcher AG, Harvey DG, Marsh ME, Osborne JM,  
573 Pathmanathan P, Pitt-Francis J, Southern J, Zemezmi N, and Gavaghan

- 574 DJ. Chaste: An Open Source C++ Library for Computational Physi-  
575 ogy and Biology. en. PLOS Computational Biology 2013 Mar; 9. Pub-  
576 lisher: Public Library of Science:e1002970. DOI: [10.1371/journal.pcbi.](https://doi.org/10.1371/journal.pcbi.1002970)  
577 [1002970](https://doi.org/10.1371/journal.pcbi.1002970). Available from: [https://journals.plos.org/ploscompbiol/](https://journals.plos.org/ploscompbiol/article?id=10.1371/journal.pcbi.1002970)  
578 [article?id=10.1371/journal.pcbi.1002970](https://journals.plos.org/ploscompbiol/article?id=10.1371/journal.pcbi.1002970) [Accessed on: 2022 Jun  
579 17]
- 580 6. Sandersius SA and Newman TJ. Modeling cell rheology with the Sub-  
581 cellular Element Model. en. Physical Biology 2008 Apr; 5:015002. DOI:  
582 [10.1088/1478-3975/5/1/015002](https://doi.org/10.1088/1478-3975/5/1/015002). Available from: [https://iopscience.](https://iopscience.iop.org/article/10.1088/1478-3975/5/1/015002)  
583 [iop.org/article/10.1088/1478-3975/5/1/015002](https://iopscience.iop.org/article/10.1088/1478-3975/5/1/015002) [Accessed on: 2022  
584 Aug 18]
- 585 7. Fortuna I, Perrone GC, Krug MS, Susin E, Belmonte JM, Thomas GL,  
586 Glazier JA, and Almeida RMC de. CompuCell3D Simulations Reproduce  
587 Mesenchymal Cell Migration on Flat Substrates. en. Biophysical Journal  
588 2020 Jun; 118:2801–15. DOI: [10.1016/j.bpj.2020.04.024](https://doi.org/10.1016/j.bpj.2020.04.024). Avail-  
589 able from: [https://www.sciencedirect.com/science/article/pii/](https://www.sciencedirect.com/science/article/pii/S0006349520303490)  
590 [S0006349520303490](https://www.sciencedirect.com/science/article/pii/S0006349520303490) [Accessed on: 2022 Jun 17]
- 591 8. Thompson AP, Aktulga HM, Berger R, Bolintineanu DS, Brown WM,  
592 Crozier PS, 't Veld PJ in, Kohlmeyer A, Moore SG, Nguyen TD, Shan R,  
593 Stevens MJ, Tranchida J, Trott C, and Plimpton SJ. LAMMPS - a flexible  
594 simulation tool for particle-based materials modeling at the atomic, meso,  
595 and continuum scales. en. Computer Physics Communications 2022 Feb;  
596 271:108171. DOI: [10.1016/j.cpc.2021.108171](https://doi.org/10.1016/j.cpc.2021.108171). Available from: [https:](https://www.sciencedirect.com/science/article/pii/S0010465521002836)  
597 [//www.sciencedirect.com/science/article/pii/S0010465521002836](https://www.sciencedirect.com/science/article/pii/S0010465521002836)  
598 [Accessed on: 2022 Jun 17]
- 599 9. Anderson JA, Glaser J, and Glotzer SC. HOOMD-blue: A Python package  
600 for high-performance molecular dynamics and hard particle Monte Carlo

- 601 simulations. en. Computational Materials Science 2020 Feb; 173:109363.  
602 DOI: [10.1016/j.commatsci.2019.109363](https://doi.org/10.1016/j.commatsci.2019.109363). Available from: [https://](https://www.sciencedirect.com/science/article/pii/S0927025619306627)  
603 [www.sciencedirect.com/science/article/pii/S0927025619306627](https://www.sciencedirect.com/science/article/pii/S0927025619306627)  
604 [Accessed on: 2022 Jun 17]
- 605 10. Phillips JC, Braun R, Wang W, Gumbart J, Tajkhorshid E, Villa E,  
606 Chipot C, Skeel RD, Kalé L, and Schulten K. Scalable molecular dynamics  
607 with NAMD. en. Journal of Computational Chemistry 2005; 26. eprint:  
608 <https://onlinelibrary.wiley.com/doi/pdf/10.1002/jcc.20289:1781-802>. DOI:  
609 [10.1002/jcc.20289](https://doi.org/10.1002/jcc.20289). Available from: [https://onlinelibrary.wiley.](https://onlinelibrary.wiley.com/doi/abs/10.1002/jcc.20289)  
610 [com/doi/abs/10.1002/jcc.20289](https://onlinelibrary.wiley.com/doi/abs/10.1002/jcc.20289) [Accessed on: 2022 Jun 17]
- 611 11. Hess B, Kutzner C, Spoel D van der, and Lindahl E. GROMACS 4: Algo-  
612 rithms for Highly Efficient, Load-Balanced, and Scalable Molecular Sim-  
613 ulation. Journal of Chemical Theory and Computation 2008 Mar; 4.  
614 Publisher: American Chemical Society:435-47. DOI: [10.1021/ct700301q](https://doi.org/10.1021/ct700301q).  
615 Available from: <https://doi.org/10.1021/ct700301q> [Accessed on:  
616 2022 Jun 17]
- 617 12. Shafee A, McCune M, Forgacs G, and Kosztin I. Post-deposition bioink  
618 self-assembly: a quantitative study. en. Biofabrication 2015 Nov; 7. Pub-  
619 lisher: IOP Publishing:045005. DOI: [10.1088/1758-5090/7/4/045005](https://doi.org/10.1088/1758-5090/7/4/045005).  
620 Available from: <https://doi.org/10.1088/1758-5090/7/4/045005>  
621 [Accessed on: 2022 Jun 17]
- 622 13. Schroeder W, Avila L, and Hoffman W. Visualizing with VTK: a tutorial.  
623 IEEE Computer Graphics and Applications 2000 Sep; 20. Conference  
624 Name: IEEE Computer Graphics and Applications:20-7. DOI: [10.1109/](https://doi.org/10.1109/38.865875)  
625 [38.865875](https://doi.org/10.1109/38.865875)
- 626 14. Sego TJ, Prideaux M, Sterner J, McCarthy BP, Li P, Bonewald LF, Ekser  
627 B, Tovar A, and Jeshua Smith L. Computational fluid dynamic analysis

- 628 of bioprinted self-supporting perfused tissue models. en. *Biotechnology and*  
629 *Bioengineering* 2020; 117. eprint: <https://onlinelibrary.wiley.com/doi/pdf/10.1002/bit.27238>:798–  
630 815. DOI: [10.1002/bit.27238](https://doi.org/10.1002/bit.27238). Available from: <https://onlinelibrary.wiley.com/doi/abs/10.1002/bit.27238> [Accessed on: 2022 Jun 17]
- 631
- 632 15. Sego TJ, Kasacheuski U, Hauersperger D, Tovar A, and Moldovan NI. A  
633 heuristic computational model of basic cellular processes and oxygenation  
634 during spheroid-dependent biofabrication. en. *Biofabrication* 2017 Jun;  
635 9. Publisher: IOP Publishing:024104. DOI: [10.1088/1758-5090/aa6ed4](https://doi.org/10.1088/1758-5090/aa6ed4).  
636 Available from: <https://doi.org/10.1088/1758-5090/aa6ed4> [Ac-  
637 cessed on: 2022 Jun 17]
- 638 16. Somogyi ET, Bouteiller JM, Glazier JA, König M, Medley JK, Swat MH,  
639 and Sauro HM. libRoadRunner: a high performance SBML simulation and  
640 analysis library. *Bioinformatics* 2015 Oct; 31:3315–21. DOI: [10.1093/](https://doi.org/10.1093/bioinformatics/btv363)  
641 [bioinformatics/btv363](https://doi.org/10.1093/bioinformatics/btv363). Available from: [https://doi.org/10.1093/](https://doi.org/10.1093/bioinformatics/btv363)  
642 [bioinformatics/btv363](https://doi.org/10.1093/bioinformatics/btv363) [Accessed on: 2022 Jun 17]
